# Supplementary material
Source: ML conference proceedings conference paper supplement (https://openaccess.thecvf.com/content/CVPR2022/html/Verbin_Ref-NeRF_Structured_View-Dependent_CVPR_2022_paper.html)
Supplement: Supplementary file 1 [file Verbin_Ref-NeRF_Structured_View-Dependent_CVPR_2022_supplemental.pdf]

# Ref-NeRF: Structured View-Dependent Appearance for Neural Radiance Fields

## Supplemental Material

Dor Verbin<sup>1,2</sup> Peter Hedman<sup>2</sup> Ben Mildenhall<sup>2</sup>  
 Todd Zickler<sup>1</sup> Jonathan T. Barron<sup>2</sup> Pratul P. Srinivasan<sup>2</sup>  
<sup>1</sup>Harvard University <sup>2</sup>Google Research

### A. Integrated Directional Encoding Proofs

We begin by proving the expression for the expected value of a spherical harmonic under a vMF distribution in Equation 7 in our main paper.

**Claim 1.** *The expected value of a spherical harmonic function  $Y_\ell^m(\hat{\omega})$  under a vMF distribution with mean  $\hat{\omega}_r$  and concentration parameter  $\kappa$  is:*

$$\mathbb{E}_{\hat{\omega} \sim \text{vMF}(\hat{\omega}_r, \kappa)}[Y_\ell^m(\hat{\omega})] = A_\ell(\kappa) Y_\ell^m(\hat{\omega}_r), \quad (\text{S1})$$

where:

$$A_\ell(\kappa) = \frac{\kappa}{2 \sinh \kappa} \int_{-1}^1 P_\ell(u) e^{\kappa u} du, \quad (\text{S2})$$

with  $P_\ell$  the  $\ell$ th Legendre polynomial.

*Proof.* We begin by first aligning the mean direction of the distribution  $\hat{\omega}_r$  with the  $z$ -axis. We do this by applying a rotation matrix  $R$  to transform  $\hat{\omega}' = R\hat{\omega}$  where we choose  $R$  that satisfies  $R\hat{\omega}_r = \hat{z}$ . Since the Jacobian of this transformation has unit determinant, we can write:

$$\begin{aligned} \mathbb{E}_{\hat{\omega} \sim \text{vMF}(\hat{\omega}_r, \kappa)}[Y_\ell^m(\hat{\omega})] &= c(\kappa) \int_{S^2} Y_\ell^m(\hat{\omega}) e^{\kappa \hat{\omega}_r^\top \hat{\omega}} d\hat{\omega} \\ &= c(\kappa) \int_{S^2} Y_\ell^m(R^{-1}\hat{\omega}) e^{\kappa \cos \theta} d\hat{\omega}, \end{aligned} \quad (\text{S3})$$

where  $c(\kappa) = \frac{\kappa}{4\pi \sinh \kappa}$  is the normalization factor of the vMF distribution, and  $\theta$  is the angle between  $\hat{\omega}_r$  and the  $z$ -axis.

A rotated spherical harmonic can be written as a linear combination of all spherical harmonics of the same degree, with coefficients specified by the Wigner D-matrix of the rotation:

$$Y_\ell^m(R^{-1}\hat{\omega}) = \sum_{m'=-\ell}^{\ell} D_{mm'}^{(\ell)}(\hat{\omega}_r) Y_\ell^{m'}(\hat{\omega}). \quad (\text{S4})$$

Plugging this into the expression from Equation S3:

$$\begin{aligned} \mathbb{E}_{\hat{\omega} \sim \text{vMF}(\hat{\omega}_r, \kappa)}[Y_\ell^m(\hat{\omega})] \\ = c(\kappa) \sum_{m'=-\ell}^{\ell} D_{mm'}^{(\ell)}(\hat{\omega}_r) \int_{S^2} Y_\ell^{m'}(\hat{\omega}) e^{\kappa \cos \theta} d\hat{\omega}. \end{aligned} \quad (\text{S5})$$

The azimuthal dependence of the integrand is periodic in  $2\pi$  for any  $m' \neq 0$ , so the only integral that does not vanish is the one with  $m' = 0$ , yielding:

$$\begin{aligned} \mathbb{E}_{\hat{\omega} \sim \text{vMF}(\hat{\omega}_r, \kappa)}[Y_\ell^m(\hat{\omega})] \\ = c(\kappa) D_{m0}^{(\ell)}(\hat{\omega}_r) \int_{S^2} Y_\ell^0(\hat{\omega}) e^{\kappa \cos \theta} d\hat{\omega}. \end{aligned} \quad (\text{S6})$$

Plugging the known expression for the  $\ell$ th degree 0th order spherical harmonic  $Y_\ell^0(\hat{\omega}) = \sqrt{\frac{2\ell+1}{4\pi}} P_\ell(\cos \theta)$  and the corresponding elements of the Wigner D-matrix  $D_{m0}^{(\ell)}(\hat{\omega}_r) = \sqrt{\frac{4\pi}{2\ell+1}} Y_\ell^m(\hat{\omega}_r)$ , and integrating over the azimuthal angle, we get:

$$\begin{aligned} \mathbb{E}_{\hat{\omega} \sim \text{vMF}(\hat{\omega}_r, \kappa)}[Y_\ell^m(\hat{\omega})] \\ = 2\pi c(\kappa) Y_\ell^m(\hat{\omega}_r) \int_0^\pi P_\ell(\cos \theta) e^{\kappa \cos \theta} \sin \theta d\theta \\ = 2\pi c(\kappa) Y_\ell^m(\hat{\omega}_r) \int_{-1}^1 P_\ell(u) e^{\kappa u} du \\ = \frac{\kappa}{2 \sinh \kappa} Y_\ell^m(\hat{\omega}_r) \int_{-1}^1 P_\ell(u) e^{\kappa u} du \\ = A_\ell(\kappa) Y_\ell^m(\hat{\omega}_r), \end{aligned} \quad (\text{S7})$$

where the second equality was obtained using the change of variables  $u = \cos \theta$ .  $\square$

Next, we show that the integral has a closed-form solution, leading to a simple expression for the  $\ell$ th attenuation function,  $A_\ell(\kappa)$ .

**Claim 2.** For any  $\ell \in \mathbb{N}$  the attenuation function  $A_\ell$  satisfies:

$$A_\ell(\kappa) = \kappa^{-\ell} \sum_{i=0}^{\ell} \frac{(2\ell-i)!}{i!(\ell-i)!} (-2)^{i-\ell} b_i(\kappa), \quad (\text{S8})$$

where  $b_i(\kappa) = \kappa^i$  for even values of  $i$  and  $b_i(\kappa) = \kappa^i \coth(\kappa)$  for odd  $i$ .

*Proof.* We prove this by first finding a recurrence relation for the attenuation functions, and then proving our expression by induction.

From Equation S2, the  $(\ell-1)$ th attenuation function can be written as:

$$\begin{aligned} A_{\ell-1}(\kappa) &= \frac{\kappa}{2 \sinh \kappa} \int_{-1}^1 P_{\ell-1}(u) e^{\kappa u} du \\ &= \frac{\kappa}{2 \sinh \kappa} \int_{-1}^1 \left( \frac{d}{du} \frac{P_\ell(u) - P_{\ell-2}(u)}{2\ell-1} \right) e^{\kappa u} du \\ &= \frac{\kappa}{2 \sinh \kappa} \left( \frac{P_\ell(u) - P_{\ell-2}(u)}{2\ell-1} \right) e^{\kappa u} \Big|_{-1}^1 \\ &\quad - \frac{\kappa^2}{2 \sinh \kappa} \int_{-1}^1 \left( \frac{P_\ell(u) - P_{\ell-2}(u)}{2\ell-1} \right) e^{\kappa u} du \\ &= -\frac{\kappa}{2\ell-1} (A_\ell(\kappa) - A_{\ell-2}(\kappa)). \end{aligned} \quad (\text{S9})$$

where the second equality was obtained using a known recurrence relation of the Legendre polynomials, the third was obtained using integration by parts, and the fourth by using the fact that  $P_\ell(\pm 1) - P_{\ell-2}(\pm 1) = 0$ . Reordering, we get:

$$A_\ell(\kappa) = A_{\ell-2}(\kappa) - \frac{2\ell-1}{\kappa} A_{\ell-1}(\kappa). \quad (\text{S10})$$

We can easily find the first two attenuation functions by directly computing the integrals:

$$\begin{aligned} A_0(\kappa) &= \frac{\kappa}{2 \sinh \kappa} \int_{-1}^1 e^{\kappa u} du = 1, \\ A_1(\kappa) &= \frac{\kappa}{2 \sinh \kappa} \int_{-1}^1 u e^{\kappa u} du = \coth(\kappa) - \frac{1}{\kappa}. \end{aligned} \quad (\text{S11})$$

Finally, we prove our claim by induction using the recurrence relation in Equation S10. It is easy to verify that our expression holds for  $\ell = 0$  and  $\ell = 1$  by plugging these values in Equation S8 and comparing with Equation S11.

We now assume that the relation holds for any  $\ell-2$  and  $\ell-1$  and prove it for  $\ell \geq 2$ . We can do this by considering the coefficient of  $\kappa^{-m}$  for every  $m \in \{0, \dots, \ell\}$  of the right hand side of Equation S10, and show that it is identical to the one from Equation S8. We begin by separately considering  $m = 0$ ,  $m = \ell-1$  and  $m = \ell$ , and then any other  $m$ . Note that for some  $m$  values  $\kappa^{-m}$  is multiplied by  $\coth(\kappa)$ ,

but this factor always matches in  $A_{\ell-2}(\kappa)$ , in  $\frac{1}{\kappa} A_{\ell-1}(\kappa)$ , and in  $A_\ell(\kappa)$ , so we neglect it.

For  $m = 0$ , the only contribution to the coefficient of  $\kappa^0$  is from  $A_{\ell-2}$ , which gives a coefficient of 1, matching with the  $\kappa^0$  coefficient of  $A_\ell$ .

For  $m = \ell-1$  we only get a contribution from the second term, and the coefficient is:

$$\begin{aligned} &-(2\ell-1) \frac{(2\ell-3)!}{1!(\ell-2)!} (-2)^{2-\ell} \\ &= \frac{(2\ell-1)(\ell-1)(2\ell-3)!}{1!(\ell-1)(\ell-2)!} \cdot 2 \cdot (-2)^{1-\ell} \\ &= \frac{(2\ell-1)(2\ell-2)(2\ell-3)!}{1!(\ell-1)(\ell-2)!} (-2)^{1-\ell} \\ &= \frac{(2\ell-1)!}{1!(\ell-1)!} (-2)^{1-\ell}, \end{aligned} \quad (\text{S12})$$

which matches with that of  $A_\ell$  from Equation S8.

Similarly, for  $m = \ell$  the contribution is also from the second term, with the coefficient:

$$\begin{aligned} &-(2\ell-1) \frac{(2\ell-2)!}{0!(\ell-1)!(-2)^{1-\ell}} \\ &= 2 \frac{(2\ell-1)!}{0!(\ell-1)!} (-2)^\ell \\ &= 2 \frac{2\ell(2\ell-1)!}{0! \cdot 2\ell \cdot (\ell-1)!} (-2)^\ell \\ &= \frac{(2\ell)!}{0!\ell!} (-2)^{-\ell}, \end{aligned} \quad (\text{S13})$$

and again this matches with the coefficient of  $A_\ell$ .

Finally, for any  $m \in \{1, \dots, \ell-2\}$ , we have that the coefficient of  $\kappa^{-m}$  on the right hand side of Equation S10 is:

$$\begin{aligned} &\frac{(\ell+m-2)!}{(\ell-m-2)!m!} (-2)^{-m} \\ &- (2\ell-1) \frac{(\ell+m-2)!}{(\ell-m)! (m-1)!} (-2)^{1-m} \\ &= \frac{(-2)^{-m} (\ell+m-2)!}{(\ell-m)! m!} \\ &\quad \cdot [(\ell-m)(\ell-m-1) + 2m(2\ell-1)] \\ &= \frac{(-2)^{-m} (\ell+m-2)!}{(\ell-m)! m!} (\ell+m)(\ell+m-1) \\ &= \frac{(\ell+m)!}{(\ell-m)! m!} (-2)^{-m}, \end{aligned} \quad (\text{S14})$$

which is identical to the coefficient in Equation S8, finishing our proof.  $\square$

Computing the attenuation function using Equation S8 is inefficient, and it is numerically unstable due to catastrophic

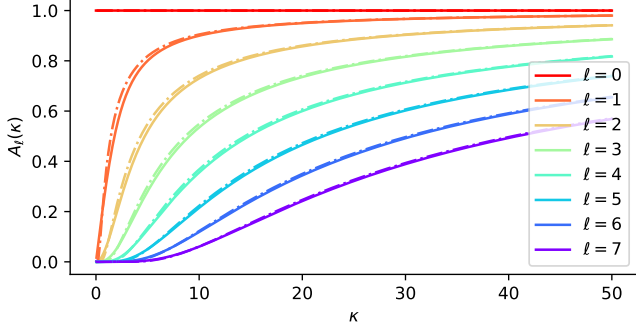

Figure S1. The first eight attenuation functions  $A_\ell(\kappa)$ . The exact expression (in solid lines) matches the approximation (in dashed lines), with an increasing accuracy as  $\ell$  increases.

cancellation. In Equation 8 of the main paper we present an approximation which is guaranteed to be close to the exact functions from Equation S8, for large values of  $\kappa$ . We finish this section with a proof of this claim. Additionally, Figure S1 shows that our approximation closely resembles the exact attenuation functions for all values of  $\kappa > 0$  and all orders  $\ell$ , and that its quality improves as  $\ell$  increases.

**Claim 3.** *For large values of  $\kappa$ , our approximation is exact up to an  $O(1/\kappa^2)$  term, i.e.:*

$$A_\ell(\kappa) = \exp\left(-\frac{\ell(\ell+1)}{2\kappa}\right) + O\left(\frac{1}{\kappa^2}\right) \quad (\text{S15})$$

*Proof.* Using the fact that  $\coth(\kappa) = 1 + O(e^{-2\kappa})$ , and using the  $i = \ell$  and  $i = \ell - 1$  terms from the sum in Equation S8 of Claim 2, we have that:

$$A_\ell(\kappa) = 1 - \frac{\ell(\ell+1)}{2\kappa} + O\left(\frac{1}{\kappa^2}\right). \quad (\text{S16})$$

Using a 1st order Taylor approximation for the exponential function yields:

$$\exp\left(-\frac{\ell(\ell+1)}{2\kappa}\right) = 1 - \frac{\ell(\ell+1)}{2\kappa} + O\left(\frac{1}{\kappa^2}\right), \quad (\text{S17})$$

proving our claim.  $\square$

## B. Interpretations of Normal Vector Penalty

As described in the main paper, the regularization term in Equation 11 penalizes “backwards-facing” normal vectors that contribute to the ray’s final rendered color.

Note that Equation 11 applies this penalty to the normals output by the spatial MLP as opposed to the normal vectors directly computed from the gradient of the density field. While this penalty is remarkably effective at improving recovered normal vectors, we find that directly applying it to the gradient density normals sometimes affects the optimization dynamics for fine geometric structures. Even

when NeRF recovers a concentrated surface at the end of optimization, it typically passes through a fuzzier volumetric representation during optimization, and directly penalizing the gradient of the volume density can sometimes adversely affect this trajectory. Our approach of applying the orientation penalty to the predicted normals gives the spatial MLP two options at every location: it can either predict normals that agree with the density gradient ones, in which case our orientation loss is effectively applied to the density field; or it can predict normals that deviate from those computed from the density field, and incur a normal prediction penalty  $\mathcal{R}_p$ . We find that applying the penalty to predicted normals allows our method to adaptively apply the orientation loss, resulting in accurate normals without loss of fine details (see ablation studies).

Besides providing smooth normals for computing reflection directions and providing a mechanism for an adaptive corner-preserving orientation loss, the predicted normals also allow the model to directly encode view directions by predicting a constant normal direction  $\hat{\mathbf{n}}'(\mathbf{x}) = \hat{\mathbf{c}}$ , leading to a 1-to-1 mapping from view direction to reflection direction (see Equation 4). While this is discouraged by the normal prediction loss  $\mathcal{R}_p$ , our model can exploit this behavior in regions that are not well-described by a surface at a scale whose geometry the density field can capture.

## C. Optimization and Additional Model Details

**Optimization** Our implementation is based on the official JAX [2] implementation of mip-NeRF [1].

In all of our experiments on synthetic data we apply the normal orientation loss from Equation 11 and the normal prediction loss from Equation 10 of the main paper with weights of 0.1 and  $3 \cdot 10^{-4}$  respectively, relative to the standard NeRF data loss from Equation 2. In our experiments on real captured data, we apply a slightly higher weight of  $10^{-3}$  on the normal prediction loss. We use the same weights during both the coarse and fine stages.

During training, we add i.i.d. Gaussian noise with standard deviation 0.1 to the bottleneck  $\mathbf{b}$ . We find that this slightly stabilizes our model’s results in some cases by preventing it from using the bottleneck early in training.

We optimize all experiments on the Blender scenes using single-image batching to be consistent with results reported in the NeRF and mip-NeRF papers. For our Shiny Blender dataset, we sample random batches of rays from all images.

We train our model, ablations of our model, and all mip-NeRF baselines using a slightly modified version of mip-NeRF’s learning schedule: 250k optimization iterations with a batch size of  $2^{14}$ , using the Adam [3] optimizer with hyperparameters  $\beta_1 = 0.9$ ,  $\beta_2 = 0.999$ ,  $\epsilon = 10^{-6}$ , a learning rate that is annealed log-linearly from  $2 \times 10^{-3}$  to  $2 \times 10^{-5}$  with a warm-up phase of 512 iterations, and gradient clipping to a norm of  $10^{-3}$ .

|                         | chair | lego  | materials | mic   | hotdog | ficus | drums | ship  |
|-------------------------|-------|-------|-----------|-------|--------|-------|-------|-------|
| PhysSG [7]              | 24.00 | 20.19 | 18.86     | 22.33 | 24.08  | 19.02 | 20.99 | 15.35 |
| VolSDF [6]              | 30.57 | 29.46 | 29.13     | 30.53 | 35.11  | 22.91 | 20.43 | 25.51 |
| Mip-NeRF [1]            | 35.12 | 35.92 | 30.64     | 36.76 | 37.34  | 33.19 | 25.36 | 30.52 |
| Ours, standard encoding | 35.86 | 36.33 | 35.22     | 35.84 | 38.18  | 33.60 | 26.03 | 30.17 |
| Ours                    | 35.83 | 36.25 | 35.41     | 36.76 | 37.72  | 33.91 | 25.79 | 30.28 |

Table S1. Per-scene test set PSNRs on the Blender dataset [5].

|                         | chair | lego  | materials | mic   | hotdog | ficus | drums | ship  |
|-------------------------|-------|-------|-----------|-------|--------|-------|-------|-------|
| PhysSG [7]              | 0.898 | 0.821 | 0.838     | 0.933 | 0.912  | 0.873 | 0.884 | 0.727 |
| VolSDF [6]              | 0.949 | 0.951 | 0.954     | 0.969 | 0.972  | 0.929 | 0.893 | 0.842 |
| Mip-NeRF [1]            | 0.981 | 0.980 | 0.959     | 0.992 | 0.982  | 0.980 | 0.933 | 0.885 |
| Ours, standard encoding | 0.984 | 0.981 | 0.983     | 0.991 | 0.984  | 0.982 | 0.939 | 0.878 |
| Ours                    | 0.984 | 0.981 | 0.983     | 0.992 | 0.984  | 0.983 | 0.937 | 0.880 |

Table S2. Per-scene test set SSIMs on the Blender dataset [5].

|                         | chair | lego  | materials | mic   | hotdog | ficus | drums | ship  |
|-------------------------|-------|-------|-----------|-------|--------|-------|-------|-------|
| PhysSG [7]              | 0.093 | 0.172 | 0.142     | 0.082 | 0.117  | 0.112 | 0.113 | 0.322 |
| VolSDF [6]              | 0.056 | 0.054 | 0.048     | 0.191 | 0.043  | 0.068 | 0.119 | 0.191 |
| Mip-NeRF [1]            | 0.020 | 0.018 | 0.040     | 0.008 | 0.026  | 0.021 | 0.064 | 0.135 |
| Ours, standard encoding | 0.017 | 0.018 | 0.023     | 0.008 | 0.022  | 0.020 | 0.059 | 0.143 |
| Ours                    | 0.017 | 0.018 | 0.022     | 0.007 | 0.022  | 0.019 | 0.059 | 0.139 |

Table S3. Per-scene test set LPIPS on the Blender dataset [5].

|                         | chair  | lego   | materials | mic    | hotdog | ficus  | drums  | ship   |
|-------------------------|--------|--------|-----------|--------|--------|--------|--------|--------|
| PhysSG [7]              | 18.569 | 40.244 | 18.986    | 26.053 | 28.572 | 35.974 | 21.696 | 43.265 |
| VolSDF [6]              | 14.085 | 26.619 | 8.277     | 19.579 | 12.170 | 39.801 | 21.458 | 16.974 |
| Mip-NeRF [1]            | 28.044 | 30.532 | 64.074    | 36.489 | 29.303 | 53.524 | 32.374 | 37.667 |
| Ours, standard encoding | 20.018 | 26.471 | 10.162    | 25.921 | 13.920 | 41.557 | 27.766 | 34.212 |
| Ours                    | 19.852 | 24.469 | 9.531     | 24.938 | 13.211 | 41.052 | 27.853 | 31.707 |

Table S4. Per-scene test set normal MAEs on the Blender dataset [5].

**Additional Model Details** The three factors of our decomposition of color into diffuse and specular components use different nonlinearities to map the outputs of the MLPs to their appropriate ranges. The tint  $s$  and specular color  $c_s$  are computed using a sigmoid applied to the raw outputs from the MLPs:

$$\begin{aligned} c_s &= \sigma(\tilde{c}_s) \\ s &= \sigma(\tilde{s}), \end{aligned} \quad (S18)$$

where  $\tilde{c}_s$  is the three-channel raw specular color output by the directional MLP, and  $\tilde{s}$  is the three-channel raw tint output by the spatial MLP.

The diffuse color is computed by passing the corresponding three spatial MLP channels through an offset sigmoid function as follows:

$$c_d = \sigma(\tilde{c}_d - \log 3), \quad (S19)$$

where  $\tilde{c}_d$  is the spatial MLP’s raw output. The  $\log 3$  offset is designed to initialize the diffuse color around 0.25, which initializes the combined raw color to around 0.5.

The three factors are then combined into a single color using Equation 9 from the main paper.

## D. Evaluation Details

**Normal Vectors** To compute the normal vector for a ray, we sample normals along the ray  $\{\hat{n}_i\}$  using Equation 3 from the main paper, and use the volume rendering procedure from Equation 1 to compute a single normal vector:

$$\mathbf{N}(\mathbf{o}, \hat{\mathbf{d}}) = \sum_i w_i \hat{\mathbf{n}}(\mathbf{x}_i). \quad (S20)$$

|                                          | teapot | toaster | car   | ball  | coffee | helmet |
|------------------------------------------|--------|---------|-------|-------|--------|--------|
| PhysSG [7]                               | 35.83  | 18.59   | 24.40 | 27.24 | 23.71  | 27.51  |
| Mip-NeRF [1]                             | 46.00  | 22.37   | 26.50 | 25.94 | 30.36  | 27.39  |
| Mip-NeRF, 8 layers                       | 47.35  | 25.51   | 27.99 | 27.53 | 32.14  | 29.04  |
| Mip-NeRF, 8 layers, w/ normals           | 47.09  | 25.14   | 27.97 | 26.79 | 32.12  | 29.21  |
| Mip-NeRF, 8 layers, with $\mathcal{R}_o$ | 47.35  | 25.32   | 27.91 | 26.89 | 32.21  | 29.22  |
| Ours, no reflection                      | 44.74  | 24.04   | 27.41 | 20.94 | 31.95  | 27.76  |
| Ours, no $\mathcal{R}_o$                 | 46.80  | 25.78   | 28.43 | 27.06 | 32.58  | 29.06  |
| Ours, no pred. normals                   | 47.09  | 23.32   | 27.19 | 26.09 | 31.79  | 30.54  |
| Ours, concat. viewdir                    | 46.01  | 25.38   | 30.71 | 47.45 | 34.19  | 28.81  |
| Ours, fixed lobe                         | 46.82  | 25.57   | 30.09 | 47.25 | 34.37  | 29.00  |
| Ours, no diffuse color                   | 46.45  | 25.56   | 30.46 | 34.53 | 34.05  | 28.87  |
| Ours, no tint                            | 46.54  | 25.49   | 30.14 | 47.53 | 34.24  | 28.78  |
| Ours, no roughness                       | 45.28  | 25.39   | 30.44 | 36.33 | 33.19  | 29.72  |
| Ours, standard encoding                  | 46.55  | 26.74   | 30.53 | 47.56 | 34.45  | 29.59  |
| Ours                                     | 47.90  | 25.70   | 30.82 | 47.46 | 34.21  | 29.68  |

Table S5. Per-scene test set PSNRs on our Shiny Blender dataset.

|                                          | teapot | toaster | car   | ball  | coffee | helmet |
|------------------------------------------|--------|---------|-------|-------|--------|--------|
| PhysSG [7]                               | 0.990  | 0.805   | 0.910 | 0.947 | 0.922  | 0.953  |
| Mip-NeRF [1]                             | 0.997  | 0.891   | 0.922 | 0.935 | 0.966  | 0.939  |
| Mip-NeRF, 8 layers                       | 0.997  | 0.925   | 0.936 | 0.949 | 0.971  | 0.957  |
| Mip-NeRF, 8 layers, w/ normals           | 0.997  | 0.923   | 0.936 | 0.946 | 0.970  | 0.957  |
| Mip-NeRF, 8 layers, with $\mathcal{R}_o$ | 0.997  | 0.924   | 0.935 | 0.947 | 0.971  | 0.957  |
| Ours, no reflection                      | 0.996  | 0.912   | 0.930 | 0.905 | 0.970  | 0.950  |
| Ours, no $\mathcal{R}_o$                 | 0.997  | 0.926   | 0.937 | 0.939 | 0.971  | 0.956  |
| Ours, no pred. normals                   | 0.997  | 0.898   | 0.926 | 0.865 | 0.967  | 0.962  |
| Ours, concat. viewdir                    | 0.997  | 0.919   | 0.956 | 0.995 | 0.974  | 0.952  |
| Ours, fixed lobe                         | 0.997  | 0.920   | 0.952 | 0.995 | 0.974  | 0.954  |
| Ours, no diffuse color                   | 0.997  | 0.920   | 0.953 | 0.977 | 0.973  | 0.954  |
| Ours, no tint                            | 0.997  | 0.921   | 0.951 | 0.995 | 0.974  | 0.954  |
| Ours, no roughness                       | 0.996  | 0.917   | 0.954 | 0.983 | 0.972  | 0.958  |
| Ours, standard encoding                  | 0.997  | 0.928   | 0.954 | 0.996 | 0.975  | 0.958  |
| Ours                                     | 0.998  | 0.922   | 0.955 | 0.995 | 0.974  | 0.958  |

Table S6. Per-scene test set SSIMs on our Shiny Blender dataset.

|                                          | teapot | toaster | car   | ball  | coffee | helmet |
|------------------------------------------|--------|---------|-------|-------|--------|--------|
| PhysSG [7]                               | 0.022  | 0.194   | 0.091 | 0.179 | 0.150  | 0.089  |
| Mip-NeRF [1]                             | 0.008  | 0.123   | 0.059 | 0.168 | 0.086  | 0.108  |
| Mip-NeRF, 8 layers                       | 0.006  | 0.080   | 0.052 | 0.139 | 0.082  | 0.072  |
| Mip-NeRF, 8 layers, w/ normals           | 0.006  | 0.085   | 0.052 | 0.144 | 0.082  | 0.072  |
| Mip-NeRF, 8 layers, with $\mathcal{R}_o$ | 0.006  | 0.082   | 0.052 | 0.143 | 0.082  | 0.072  |
| Ours, no reflection                      | 0.007  | 0.091   | 0.052 | 0.192 | 0.082  | 0.080  |
| Ours, no $\mathcal{R}_o$                 | 0.008  | 0.086   | 0.051 | 0.161 | 0.082  | 0.076  |
| Ours, no pred. normals                   | 0.006  | 0.134   | 0.064 | 0.272 | 0.087  | 0.068  |
| Ours, concat. viewdir                    | 0.006  | 0.095   | 0.040 | 0.061 | 0.079  | 0.087  |
| Ours, fixed lobe                         | 0.009  | 0.096   | 0.043 | 0.061 | 0.080  | 0.080  |
| Ours, no diffuse color                   | 0.009  | 0.096   | 0.043 | 0.095 | 0.079  | 0.080  |
| Ours, no tint                            | 0.008  | 0.094   | 0.043 | 0.060 | 0.079  | 0.078  |
| Ours, no roughness                       | 0.009  | 0.099   | 0.042 | 0.086 | 0.081  | 0.074  |
| Ours, standard encoding                  | 0.007  | 0.092   | 0.041 | 0.060 | 0.077  | 0.074  |
| Ours                                     | 0.004  | 0.095   | 0.041 | 0.059 | 0.078  | 0.075  |

Table S7. Per-scene test set LPIPS on our Shiny Blender dataset.

|                                          | teapot | toaster | car    | ball    | coffee | helmet |
|------------------------------------------|--------|---------|--------|---------|--------|--------|
| PhysSG [7]                               | 6.634  | 9.749   | 8.844  | 7.700   | 22.514 | 2.324  |
| Mip-NeRF [1]                             | 66.470 | 42.787  | 40.954 | 104.765 | 29.427 | 77.904 |
| Mip-NeRF, 8 layers                       | 68.238 | 35.220  | 23.670 | 127.863 | 25.465 | 67.966 |
| Mip-NeRF, 8 layers, w/ normals           | 67.999 | 34.093  | 23.548 | 130.755 | 26.527 | 66.701 |
| Mip-NeRF, 8 layers, with $\mathcal{R}_o$ | 68.238 | 35.837  | 23.985 | 127.683 | 24.101 | 64.372 |
| Ours, no reflection                      | 19.263 | 19.325  | 13.643 | 15.142  | 9.730  | 20.038 |
| Ours, no $\mathcal{R}_o$                 | 43.116 | 43.113  | 37.134 | 106.003 | 29.301 | 56.710 |
| Ours, no pred. normals                   | 67.999 | 24.886  | 21.644 | 48.061  | 10.848 | 10.573 |
| Ours, concat. viewdir                    | 20.359 | 40.587  | 12.877 | 1.577   | 9.489  | 42.615 |
| Ours, fixed lobe                         | 35.791 | 42.183  | 18.410 | 1.536   | 24.045 | 36.785 |
| Ours, no diffuse color                   | 38.347 | 42.705  | 16.802 | 5.423   | 15.363 | 38.119 |
| Ours, no tint                            | 29.537 | 43.687  | 16.854 | 1.556   | 11.233 | 33.327 |
| Ours, no roughness                       | 33.821 | 44.666  | 17.440 | 3.557   | 26.578 | 29.723 |
| Ours, standard encoding                  | 23.123 | 41.415  | 16.214 | 1.969   | 9.749  | 29.409 |
| Ours                                     | 9.234  | 42.870  | 14.927 | 1.548   | 12.240 | 29.484 |

Table S8. Per-scene test set MAEs on our Shiny Blender dataset.

We use Equation S20 to visualize normal maps, with gray-colored values corresponding to high variance normal vectors along a ray. For evaluating MAE, we use the normalized accumulated normals,  $\tilde{\mathbf{N}} = \mathbf{N}/\|\mathbf{N}\|$ .

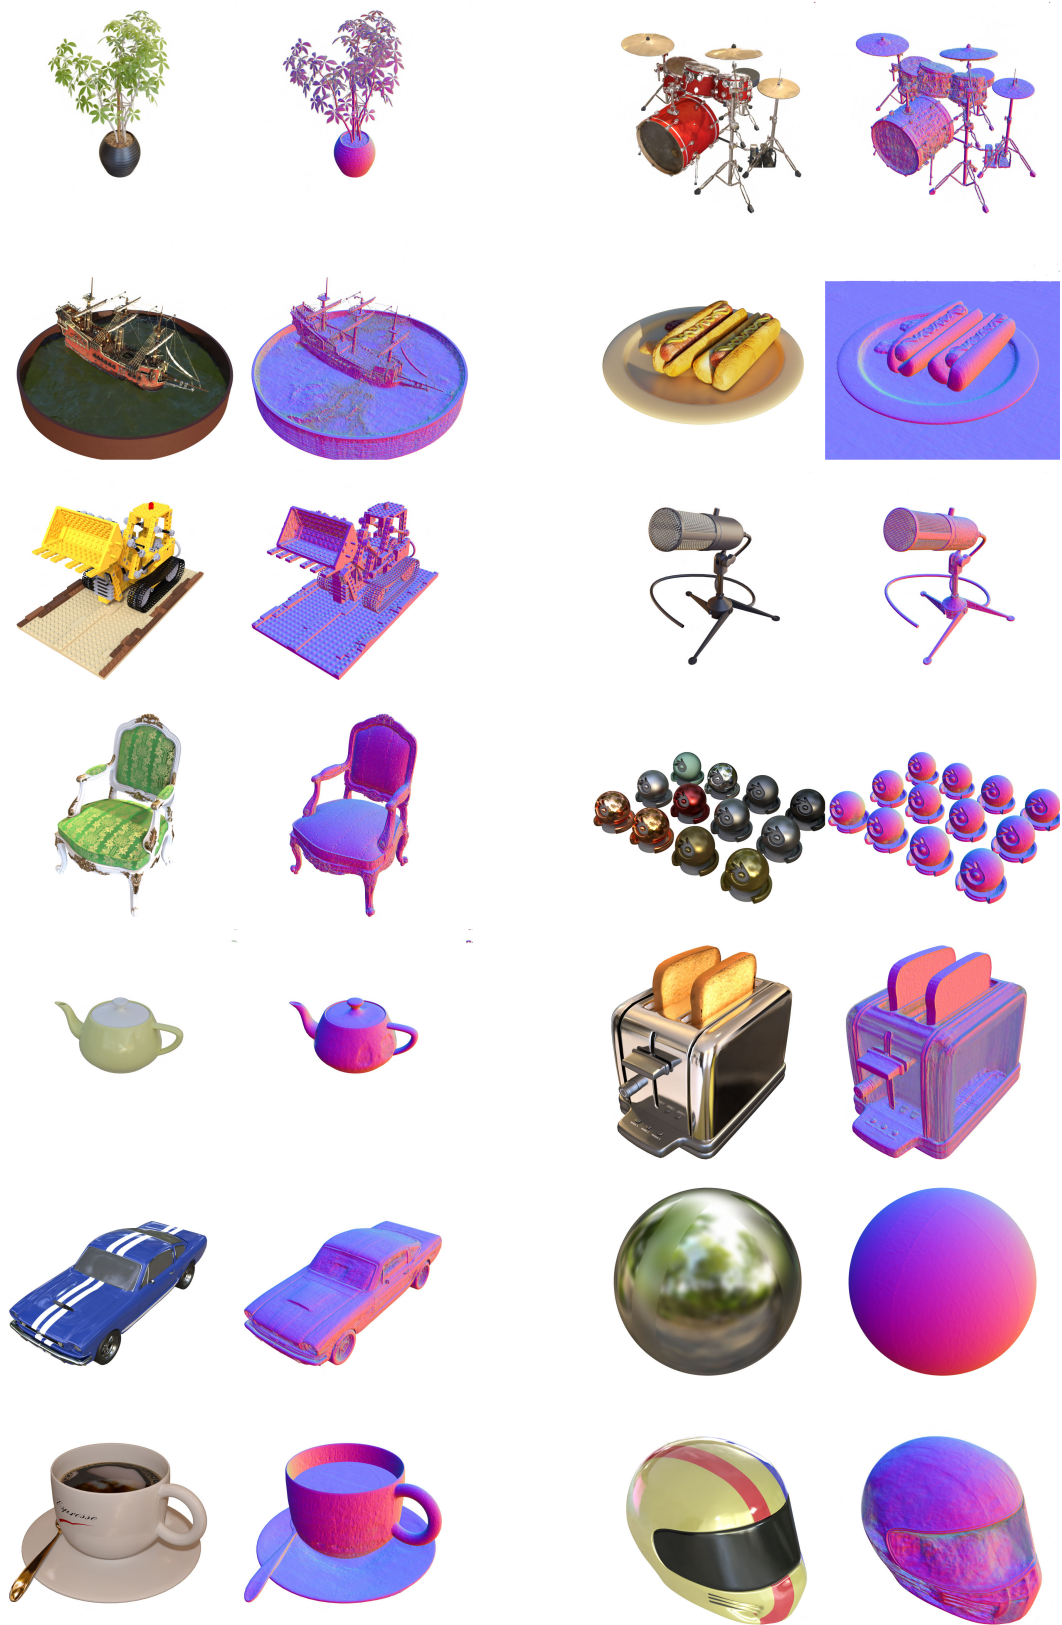

Figure S2. Rendered images and normals estimated by our method on all 14 scenes in the Blender and Shiny Blender datasets.

|                    | <i>sedan</i>                        | <i>toy car</i>                             | <i>garden spheres</i>               |
|--------------------|-------------------------------------|--------------------------------------------|-------------------------------------|
| Mip-NeRF, 8 layers | 25.53 / <b>0.729</b> / <b>0.118</b> | 24.00 / 0.663 / 0.177                      | 23.40 / <b>0.620</b> / <b>0.125</b> |
| Ours               | <b>25.65</b> / 0.720 / 0.119        | <b>24.25</b> / <b>0.674</b> / <b>0.168</b> | <b>23.46</b> / 0.601 / 0.138        |

Table S9. Quantitative metrics (PSNR/SSIM/LPIPS) on the test sets of our real captured scenes.

## E. Additional Results

Table S9 reports quantitative metrics on the test sets (every eighth image is held out for testing, as done in NeRF [5]) of our three real captured scenes. Tables S1, S2, S3, and S4 contain quantitative metrics on the original synthetic Blender dataset, and Tables S5, S6, S7, and S8 contain quantitative metrics on our new synthetic Shiny Blender dataset.

Figure S2 shows a rendered image and the normals estimated by our method for all 14 scenes from the Blender and Shiny Blender datasets.

**Baseline Implementations** For comparisons to mip-NeRF [1], we use the official open-source JAX implementation. For comparisons to PhySG [7], we use the official PyTorch code open-sourced by the authors. However, the original hyperparameters produce poor results on our datasets, so the PhySG authors helped us tune their hyperparameters for the Blender datasets. VolSDF [6] does not currently have publicly-available code, but the authors graciously ran their code on the Blender dataset and provided us with rendered test-set images and normals. We report the NSVF [4] and NeRF [5] results on the Blender dataset from the tables in the mip-NeRF paper.

## F. Dataset Details

Our new “Shiny Blender” scenes were adapted from the the following BlendSwap models:

1. Coffee: created by *sleem*, CC-0 license (model #10827).
2. Toaster: created by *PrinterKiller*, CC-BY license (model #4989)
3. Car: created by *Xali*, CC-0 license (model #24359).
4. Helmet: created by *kveidem*, CC-0 license (model #21617).

Our dataset of real scenes was captured by the authors.

## G. Societal Impact

Environmental impact is a significant concern when training NeRF-based models, as they typically require hours of training per scene. We hope that future improvements to NeRF and continued progress in developing efficient ML accelerators will ameliorate this issue. 3D scene reconstruction techniques such as ours can also be used for illicit surveillance. In particular, improved rendering of shiny surfaces has the potential to reveal details of objects outside of

the cameras’ fields of view by reconstructing their reflections off of visible objects.

## References

- [1] Jonathan T. Barron, Ben Mildenhall, Matthew Tancik, Peter Hedman, Ricardo Martin-Brualla, and Pratul P. Srinivasan. Mip-NeRF: A multiscale representation for anti-aliasing neural radiance fields. *ICCV*, 2021. 3, 4, 6
- [2] James Bradbury, Roy Frostig, Peter Hawkins, Matthew James Johnson, Chris Leary, Dougal Maclaurin, George Necula, Adam Paszke, Jake VanderPlas, Skye Wanderman-Milne, and Qiao Zhang. JAX: composable transformations of Python+NumPy programs, 2018. <http://github.com/google/jax>. 3
- [3] Diederik P. Kingma and Jimmy Ba. Adam: A method for stochastic optimization. *ICLR*, 2015. 3
- [4] Lingjie Liu, Jiatao Gu, Kyaw Zaw Lin, Tat-Seng Chua, and Christian Theobalt. Neural sparse voxel fields. *NeurIPS*, 2020. 6
- [5] Ben Mildenhall, Pratul P. Srinivasan, Matthew Tancik, Jonathan T. Barron, Ravi Ramamoorthi, and Ren Ng. NeRF: Representing scenes as neural radiance fields for view synthesis. *ECCV*, 2020. 4, 6
- [6] Lior Yariv, Jiatao Gu, Yoni Kasten, and Yaron Lipman. Volume rendering of neural implicit surfaces. *NeurIPS*, 2021. 4, 6
- [7] Kai Zhang, Fujun Luan, Qianqian Wang, Kavita Bala, and Noah Snavely. PhySG: Inverse rendering with spherical gaussians for physics-based material editing and relighting. *CVPR*, 2021. 4, 6
